# Supplementary material for: Time-Dependent Risk of Cancer After a Diabetes Diagnosis in a Cohort of 2.3 Million Adults
Source: Oxford University Press journal article supplement (doi:10.1093/aje/kwv290), 2016-06-02
Supplement: kwv290_Supplementary_Data.zip [file kwv290_Supplementary_Data.zip]

Web Table 1: Cox regression models for all site and site-specific cancers, with and without BMI adjustment. Incidence diabetes vs. diabetes-free women

| Cancer site               | No. events | 0-1 year follow-up |              | 1-2 years follow-up |            | 2+ years follow-up |            |
|---------------------------|------------|--------------------|--------------|---------------------|------------|--------------------|------------|
|                           |            | HR                 | 95% CI       | HR                  | 95% CI     | HR                 | 95% CI     |
| All-site <sup>a</sup>     | 64,921     | 4.50               | 4.39, 4.61   | 1.45                | 1.37, 1.52 | 1.42               | 1.38, 1.46 |
| Unadjusted <sup>b</sup>   | 17,113     | 4.45               | 4.25, 4.66   | 1.37                | 1.25, 1.51 | 1.43               | 1.37, 1.48 |
| BMI adjusted <sup>b</sup> | 17,113     | 4.41               | 4.21, 4.62   | 1.36                | 1.24, 1.49 | 1.41               | 1.35, 1.46 |
| Colon-rectum <sup>a</sup> | 9,019      | 6.33               | 6.00, 6.70   | 1.36                | 1.18, 1.56 | 1.44               | 1.33, 1.55 |
| Unadjusted <sup>b</sup>   | 2,167      | 6.05               | 5.39, 6.77   | 1.08                | 0.81, 1.43 | 1.43               | 1.29, 1.59 |
| BMI adjusted <sup>b</sup> | 2,167      | 6.04               | 5.39, 6.78   | 1.08                | 0.81, 1.43 | 1.43               | 1.28, 1.60 |
| Pancreas <sup>a</sup>     | 1,959      | 15.24              | 13.60, 17.08 | 5.37                | 4.38, 6.58 | 2.90               | 2.49, 3.37 |
| Unadjusted <sup>b</sup>   | 498        | 16.44              | 13.16, 20.53 | 5.81                | 4.07, 8.28 | 3.05               | 2.42, 3.83 |
| BMI adjusted <sup>b</sup> | 498        | 17.12              | 13.67, 21.44 | 6.09                | 4.26, 8.70 | 3.22               | 2.54, 4.07 |
| Kidney <sup>a</sup>       | 1,456      | 5.45               | 4.68, 6.34   | 1.73                | 1.26, 2.38 | 1.58               | 1.32, 2.90 |
| Unadjusted <sup>b</sup>   | 376        | 6.48               | 4.88, 8.59   | 2.70                | 1.68, 4.34 | 1.80               | 1.39, 2.31 |
| BMI adjusted <sup>b</sup> | 376        | 6.02               | 4.53, 8.00   | 2.49                | 1.55, 4.00 | 1.64               | 1.26, 2.12 |
| Thyroid <sup>a</sup>      | 2,702      | 2.91               | 2.50, 3.38   | 1.04                | 0.76, 1.42 | 1.06               | 0.91, 1.24 |
| Unadjusted <sup>b</sup>   | 767        | 2.32               | 1.72, 3.13   | 0.84                | 0.47, 1.48 | 1.11               | 0.91, 1.37 |
| BMI adjusted <sup>b</sup> | 767        | 2.20               | 1.62, 2.97   | 0.79                | 0.44, 1.40 | 1.04               | 0.85, 1.29 |
| Corpus Uteri <sup>a</sup> | 3016       | 4.68               | 4.17, 5.24   | 1.79                | 1.43, 2.23 | 1.79               | 1.58, 2.02 |

|                                    |        |      |            |      |            |      |            |
|------------------------------------|--------|------|------------|------|------------|------|------------|
| Unadjusted <sup>b</sup>            | 814    | 4.24 | 3.40, 5.29 | 1.71 | 1.16, 2.52 | 1.91 | 1.62, 2.25 |
| BMI adjusted <sup>b</sup>          | 814    | 3.41 | 2.73, 4.26 | 1.33 | 0.90, 1.97 | 1.43 | 1.21, 1.69 |
| Breast Premenopausal <sup>a</sup>  | 4,083  | 3.36 | 2.90, 3.90 | 1.02 | 0.72, 1.44 | 1.02 | 0.86, 1.20 |
| Unadjusted <sup>b</sup>            | 813    | 4.71 | 3.54, 6.27 | 1.12 | 0.58, 2.17 | 0.99 | 0.77, 1.27 |
| BMI adjusted <sup>b</sup>          | 813    | 5.09 | 3.80, 6.82 | 1.22 | 0.63, 2.35 | 1.06 | 0.83, 1.37 |
| Breast Postmenopausal <sup>a</sup> | 15,858 | 2.10 | 1.98, 2.23 | 1.14 | 1.02, 1.26 | 1.12 | 1.06, 1.18 |
| Unadjusted <sup>b</sup>            | 4,664  | 2.16 | 1.93, 2.41 | 1.12 | 0.94, 1.34 | 1.27 | 1.18, 1.36 |
| BMI adjusted <sup>b</sup>          | 4,664  | 2.08 | 1.85, 2.32 | 1.07 | 0.90, 1.29 | 1.21 | 1.12, 1.30 |

HR: hazard ratio; CI: confidence interval

<sup>a</sup> full analysis: for years 2002-2012

<sup>b</sup> analysis for years 2009-2012

Web Table 2: Cox regression models for all site and site-specific cancers, with and without BMI adjustment. Incidence diabetes vs. diabetes-free men

| Cancer site               | No. events | 0-1 year follow-up |              | 1-2 years follow-up |            | 2+ years follow-up |            |
|---------------------------|------------|--------------------|--------------|---------------------|------------|--------------------|------------|
|                           |            | HR                 | 95% CI       | HR                  | 95% CI     | HR                 | 95% CI     |
| All-site <sup>a</sup>     | 63,799     | 4.27               | 4.18, 4.37   | 1.46                | 1.39, 1.53 | 1.33               | 1.29, 1.36 |
| Unadjusted <sup>b</sup>   | 16,356     | 4.34               | 4.15, 4.54   | 1.41                | 1.30, 1.54 | 1.29               | 1.24, 1.34 |
| BMI adjusted <sup>b</sup> | 16,356     | 4.40               | 4.20, 4.60   | 1.43                | 1.32, 1.56 | 1.31               | 1.26, 1.36 |
| Colon-rectum <sup>a</sup> | 9,232      | 5.90               | 5.59, 6.24   | 1.58                | 1.40, 1.79 | 1.58               | 1.47, 1.69 |
| Unadjusted <sup>b</sup>   | 2,242      | 5.55               | 4.95, 6.22   | 1.71                | 1.38, 2.12 | 1.59               | 1.44, 1.75 |
| BMI adjusted <sup>b</sup> | 2,242      | 5.40               | 4.81, 6.06   | 1.66                | 1.34, 2.06 | 1.53               | 1.38, 1.69 |
| Pancreas <sup>a</sup>     | 1,969      | 13.88              | 12.36, 15.57 | 3.45                | 2.12, 4.36 | 2.91               | 2.52, 3.37 |
| Unadjusted <sup>b</sup>   | 507        | 14.46              | 11.62, 18.00 | 3.12                | 2.03, 4.79 | 2.64               | 2.11, 3.29 |
| BMI adjusted <sup>b</sup> | 507        | 14.94              | 11.97, 18.63 | 3.34                | 2.11, 4.98 | 2.75               | 2.20, 3.45 |
| Kidney <sup>a</sup>       | 2,485      | 5.20               | 4.65, 5.82   | 1.59                | 1.26, 2.02 | 1.48               | 1.30, 1.69 |
| Unadjusted <sup>b</sup>   | 703        | 5.23               | 4.25, 6.45   | 1.83                | 1.26, 2.68 | 1.42               | 1.19, 1.71 |
| BMI adjusted <sup>b</sup> | 703        | 4.99               | 4.04, 6.16   | 1.74                | 1.19, 2.54 | 1.34               | 1.11, 1.16 |
| Thyroid <sup>a</sup>      | 833        | 3.55               | 2.80, 4.50   | 1.50                | 0.97, 2.33 | 1.25               | 0.97, 1.61 |
| Unadjusted <sup>b</sup>   | 244        | 3.00               | 1.91, 4.71   | 1.16                | 0.51, 2.63 | 1.46               | 1.06, 2.00 |
| BMI adjusted <sup>b</sup> | 244        | 2.78               | 1.77, 4.38   | 1.07                | 0.47, 2.43 | 1.34               | 0.97, 1.85 |
| Prostate <sup>a</sup>     | 14,099     | 1.65               | 1.55, 1.76   | 0.93                | 0.84, 1.03 | 0.89               | 0.84, 0.95 |

|                           |       |      |            |      |            |      |            |
|---------------------------|-------|------|------------|------|------------|------|------------|
| Unadjusted <sup>b</sup>   | 3,879 | 1.51 | 1.33, 1.72 | 0.87 | 0.72, 1.05 | 0.89 | 0.82, 0.96 |
| BMI adjusted <sup>b</sup> | 3,879 | 1.53 | 1.35, 1.73 | 0.88 | 0.73, 1.07 | 0.90 | 0.83, 0.97 |

HR: hazard ratio; CI: confidence interval

<sup>a</sup> full analysis: for years 2002-2012

<sup>b</sup> analysis for years 2009-2012

Web Table 3: Cox regression models for all site and site-specific cancers, with and without BMI adjustment. Prevalent diabetics and incident diabetes vs. diabetes-free women

| Cancer sites                  | No. events | Incident Diabetes  |              |                     |            |                    |            | Prevalent Diabetes |            |
|-------------------------------|------------|--------------------|--------------|---------------------|------------|--------------------|------------|--------------------|------------|
|                               |            | 0-1 year follow-up |              | 1-2 years follow-up |            | 2+ years follow-up |            |                    |            |
|                               |            | HR                 | 95%          | HR                  | 95%        | HR                 | 95%        | HR                 | 95%        |
| Colon-rectum <sup>a</sup>     | 9,019      | 6.33               | 6.00, 6.70   | 1.36                | 1.18, 1.56 | 1.44               | 1.33, 1.55 | 1.48               | 1.39, 1.57 |
| Unadjusted <sup>b</sup>       | 2,834      | 6.62               | 5.95, 7.35   | 1.18                | 0.91, 1.54 | 1.49               | 1.35, 1.65 | 1.37               | 1.21, 1.55 |
| Smoking adjusted <sup>b</sup> | 2,834      | 6.53               | 5.87, 7.26   | 1.16                | 0.89, 1.52 | 1.47               | 1.32, 1.62 | 1.34               | 1.19, 1.52 |
| Pancreatic <sup>a</sup>       | 1,959      | 15.24              | 13.60, 17.08 | 5.37                | 4.38, 6.58 | 2.90               | 2.49, 3.37 | 3.10               | 2.72, 3.52 |
| Unadjusted <sup>b</sup>       | 648        | 17.44              | 14.13, 21.53 | 6.01                | 4.26, 8.47 | 3.14               | 2.52, 3.92 | 3.23               | 2.52, 4.13 |
| Smoking adjusted <sup>b</sup> | 648        | 17.11              | 13.86, 21.12 | 5.89                | 4.17, 8.30 | 3.08               | 2.47, 3.84 | 3.18               | 2.49, 4.07 |
| Kidney <sup>a</sup>           | 1,456      | 5.45               | 4.68, 6.34   | 1.73                | 1.26, 2.38 | 1.58               | 1.32, 2.90 | 1.85               | 1.60, 2.16 |
| Unadjusted <sup>b</sup>       | 496        | 7.23               | 5.55, 9.43   | 2.84                | 1.80, 4.50 | 1.91               | 1.50, 2.44 | 2.12               | 1.60, 2.80 |
| Smoking adjusted <sup>b</sup> | 496        | 7.14               | 5.48, 9.31   | 2.80                | 1.77, 4.44 | 1.88               | 1.47, 2.40 | 2.09               | 1.58, 2.77 |
| Stomach <sup>a</sup>          | 1,607      | 6.68               | 5.84, 7.64   | 1.16                | 0.80, 1.67 | 1.42               | 1.18, 1.69 | 1.90               | 1.65, 2.19 |
| Unadjusted <sup>b</sup>       | 561        | 8.27               | 6.56, 10.43  | 1.17                | 0.62, 2.21 | 1.44               | 1.12, 1.84 | 2.39               | 1.87, 3.04 |
| Smoking adjusted <sup>b</sup> | 561        | 8.15               | 6.46, 10.28  | 1.15                | 0.61, 2.17 | 1.41               | 1.10, 1.81 | 2.35               | 1.84, 3.00 |
| Liver <sup>a</sup>            | 440        | 8.22               | 6.28, 10.76  | 2.02                | 1.09, 3.73 | 2.94               | 2.17, 3.97 | 3.50               | 2.74, 4.48 |
| Unadjusted <sup>b</sup>       | 145        | 7.59               | 4.44, 12.99  | 2.31                | 0.83, 6.42 | 2.94               | 1.88, 4.60 | 4.66               | 3.00, 7.24 |

|                               |       |      |             |      |            |      |            |      |            |
|-------------------------------|-------|------|-------------|------|------------|------|------------|------|------------|
| Smoking adjusted <sup>b</sup> | 145   | 7.26 | 4.24, 12.43 | 2.20 | 0.79, 6.11 | 2.79 | 1.78, 4.36 | 4.45 | 2.86, 6.92 |
| Lung cancer <sup>a</sup>      | 3,628 | 5.77 | 5.27, 6.31  | 1.67 | 1.37, 2.03 | 1.45 | 1.30, 1.62 | 1.30 | 1.17, 1.44 |
| Unadjusted <sup>b</sup>       | 1,392 | 6.83 | 5.89, 7.93  | 1.73 | 1.26, 2.37 | 1.56 | 1.35, 1.81 | 1.17 | 0.97, 1.42 |
| Smoking adjusted <sup>b</sup> | 1,392 | 6.58 | 5.67, 7.63  | 1.67 | 1.22, 2.29 | 1.52 | 1.31, 1.75 | 1.16 | 0.95, 1.40 |
| Bladder <sup>a</sup>          | 1,213 | 3.01 | 2.50, 3.62  | 0.91 | 0.59, 1.39 | 1.31 | 1.08, 1.60 | 1.16 | 0.98, 1.37 |
| Unadjusted <sup>b</sup>       | 325   | 4.10 | 2.87, 5.86  | 0.49 | 0.16, 1.54 | 1.71 | 1.30, 2.26 | 1.25 | 0.87, 1.80 |
| Smoking adjusted <sup>b</sup> | 325   | 4.03 | 2.81, 5.76  | 0.48 | 0.15, 1.52 | 1.70 | 1.28, 2.24 | 1.25 | 0.87, 1.79 |

HR: hazard ratio; CI: confidence interval

<sup>a</sup> full analysis: for years 2002-2012

<sup>b</sup> analysis for years 2009-2012

Web Table 4: Cox regression models for all site and site-specific cancers, with and without BMI adjustment. Prevalent diabetics and Incident diabetes vs. diabetes-free men

| Cancer sites                  | No. events | Incident Diabetes  |              |                     |            |                    |             | Prevalent Diabetes |            |
|-------------------------------|------------|--------------------|--------------|---------------------|------------|--------------------|-------------|--------------------|------------|
|                               |            | 0-1 year follow-up |              | 1-2 years follow-up |            | 2+ years follow-up |             |                    |            |
|                               |            | HR                 | 95%          | HR                  | 95%        | HR                 | 95%         | HR                 | 95%        |
| Colon-rectum <sup>a</sup>     | 9,232      | 5.90               | 5.59, 6.24   | 1.58                | 1.40, 1.79 | 1.58               | 1.47, 1.69  | 1.45               | 1.37, 1.55 |
| Unadjusted <sup>b</sup>       | 2,966      | 6.30               | 5.67, 7.00   | 1.83                | 1.49, 2.25 | 1.68               | 1.53, 1.85  | 1.47               | 1.31, 1.66 |
| Smoking adjusted <sup>b</sup> | 2,966      | 6.12               | 5.59, 6.90   | 1.80                | 1.46, 2.21 | 1.64               | 1.49, 1.80  | 1.44               | 1.28, 1.62 |
| Pancreatic <sup>a</sup>       | 1,969      | 13.88              | 12.36, 15.57 | 3.45                | 2.12, 4.36 | 2.91               | 2.52, 3.37  | 3.25               | 2.85, 3.69 |
| Unadjusted <sup>b</sup>       | 695        | 16.36              | 13.35, 20.03 | 3.12                | 2.04, 4.77 | 3.04               | 2.46, 3.74  | 3.19               | 2.51, 4.05 |
| Smoking adjusted <sup>b</sup> | 695        | 15.89              | 12.97, 19.47 | 3.01                | 1.97, 4.60 | 2.91               | 2.36, 3.59  | 3.06               | 2.41, 3.89 |
| Kidney <sup>a</sup>           | 2,485      | 5.20               | 4.65, 5.82   | 1.59                | 1.26, 2.02 | 1.48               | 1.30, 1.69  | 1.51               | 1.34, 1.71 |
| Unadjusted <sup>b</sup>       | 889        | 5.81               | 4.77, 7.08   | 1.95                | 1.34, 2.82 | 1.59               | 1.33, 1.89  | 1.48               | 1.17, 1.85 |
| Smoking adjusted <sup>b</sup> | 889        | 5.69               | 4.67, 6.94   | 1.91                | 1.31, 2.76 | 1.55               | 1.30, 1.85  | 1.44               | 1.45, 1.82 |
| Stomach <sup>a</sup>          | 2,343      | 6.06               | 5.43, 6.76   | 1.79                | 1.42, 2.25 | 1.45               | 1.26, 1.67  | 1.69               | 1.50, 1.90 |
| Unadjusted <sup>b</sup>       | 809        | 6.78               | 5.58, 8.23   | 2.26                | 1.58, 3.23 | 1.41               | 1.16, 1.71  | 1.49               | 1.18, 1.86 |
| Smoking adjusted <sup>b</sup> | 809        | 6.49               | 5.34, 7.89   | 2.15                | 1.51, 3.08 | 1.33               | 1.10, 1.62  | 1.41               | 1.12, 1.77 |
| Liver <sup>a</sup>            | 807        | 7.34               | 6.05, 8.91   | 2.85                | 1.99, 4.09 | 2.27               | 1.80, 2.86) | 3.00               | 2.49, 3.61 |
| Unadjusted <sup>b</sup>       | 254        | 10.10              | 7.04, 14.48  | 3.34                | 1.77, 6.27 | 2.70               | 1.93, 3.78  | 3.34               | 2.31, 4.43 |

|                               |       |      |             |      |            |      |            |      |            |
|-------------------------------|-------|------|-------------|------|------------|------|------------|------|------------|
| Smoking adjusted <sup>b</sup> | 254   | 9.49 | 6.62, 13.62 | 3.10 | 1.65, 5.83 | 2.49 | 1.78, 3.48 | 3.08 | 2.13, 4.45 |
| Lung cancer <sup>a</sup>      | 7,294 | 5.61 | 2.28, 5.97  | 1.64 | 1.44, 1.87 | 1.19 | 1.10, 1.29 | 1.26 | 1.17, 1.35 |
| Unadjusted <sup>b</sup>       | 2,570 | 6.84 | 6.15, 7.62  | 2.05 | 1.67, 2.51 | 1.34 | 1.21, 1.49 | 1.31 | 1.15, 1.49 |
| Smoking adjusted <sup>b</sup> | 2,570 | 6.30 | 5.66, 7.01  | 1.88 | 1.53, 2.30 | 1.23 | 1.10, 1.36 | 1.21 | 1.07, 1.38 |
| Bladder <sup>a</sup>          | 5,367 | 3.05 | 2.80, 3.32  | 1.40 | 1.20, 1.63 | 1.25 | 1.14, 1.37 | 1.27 | 1.18, 1.38 |
| Unadjusted <sup>b</sup>       | 1,496 | 4.21 | 3.59, 4.95  | 1.24 | 0.89, 1.72 | 1.37 | 1.20, 1.56 | 1.45 | 1.24, 1.69 |
| Smoking adjusted <sup>b</sup> | 1,496 | 4.12 | 3.51, 4.85  | 1.22 | 0.88, 1.69 | 1.35 | 1.18, 1.54 | 1.44 | 1.23, 1.69 |

HR: hazard ratio; CI: confidence interval

<sup>a</sup> full analysis: for years 2002-2012

<sup>b</sup> analysis for years 2009-2012
